# Supplementary material
Source: publisher figshare collection journal article supplement (https://tandf.figshare.com/articles/dataset/_/7992218)
Supplement: Supplementary file 1 [file 1]

Archive with 3 entries (3 files):
- Mn-checkcif.pdf
- Zn-checkcif.pdf
- supplementary materials.doc
